# Supplementary material
Source: publisher site journal article supplement (https://www.dovepress.com/article/589014)
Supplement: Supplementary file 1 [file 589014%20Supplementary%20Material.docx]

**Supplementary Appendix**

**Supplement to:**

Bridging Accessibility and Precision: Evaluating the Reliability and Validity of a Smartphone-Based Skin Colorimeter

**First author:**

Hongfei Ouyang, China-Japan Friendship Hospital (Institute of Clinical Medical Sciences), Chinese Academy of Medical Sciences & Peking Union Medical College, Beijing, People’s Republic of China, E-mail: [ouyanghfnw@163.com](mailto:ouyanghfnw@163.com)

***Corresponding:**

Yong Cui, China-Japan Friendship Hospital (Institute of Clinical Medical Sciences), Chinese Academy of Medical Sciences & Peking Union Medical College, Beijing, People’s Republic of China, Email [wuhucuiyong@vip.163.com](mailto:wuhucuiyong@vip.163.com)

Liang Wu, Hangzhou C2H4 Internet Technology Co., Ltd, Hangzhou, People’s Republic of China, Email [lwu@c2h4.cn](mailto:lwu@c2h4.cn)

**Supplementary Table S1.** Subgroup Analysis of YLGTD Reliability and Validity Stratified by Smartphone Platform

| Smartphone platform | Parameter | YLGTD user vs. physician mode | | YLGTD vs. DermaLab | |
| --- | --- | --- | --- | --- | --- |
| **ICC (95% CI)** | **Mean bias (SD)** | **r (95% CI)** | ***p*** |
| iPhone (n = 56) | L | 0.95 (0.92-0.97) | −0.09 (2.55) | 0.66 (0.48-0.79) | < 0.0001 |
| a | 0.82 (0.71-0.89) | 0.00 (1.43) | 0.44 (0.20-0.63) | 0.0007 |
| b | 0.89 (0.70-0.95) | −1.11 (1.61) | 0.55 (0.34-0.71) | < 0.0001 |
| Skin color level | 0.94 (0.85-0.97) | −9.58 (17.35) | −0.84 (−0.90-−0.73) | < 0.0001 |
| Skin color temperature | 0.84 (0.60-0.92) | −42.02 (64.23) | 0.73 (0.58-0.83) | < 0.0001 |
| Skin color hue | 0.81 (0.61-0.90) | −1.39 (2.56) | 0.50 (0.27-0.68) | < 0.0001 |
| Android (n = 49) | L | 0.94 (0.89-0.97) | −0.20 (2.88) | 0.78 (0.65-0.87) | < 0.0001 |
| a | 0.88 (0.79-0.93) | 0.39 (1.44) | 0.02 (−0.26-0.30) | 0.8870 |
| b | 0.92 (0.79-0.96) | −0.86 (1.38) | 0.64 (0.44-0.79) | < 0.0001 |
| Skin color level | 0.94 (0.90-0.97) | −5.57 (20.01) | −0.79 (−0.88-−0.65) | < 0.0001 |
| Skin color temperature | 0.91 (0.73-0.96) | −40.29 (57.08) | 0.83 (0.71-0.90) | < 0.0001 |
| Skin color hue | 0.89 (0.70-0.95) | −1.49 (2.21) | 0.62 (0.41-0.77) | < 0.0001 |

**Notes:** Mean bias represents the mean difference between YLGTD user and physician measurements (User − Physician). Pearson's correlation coefficients (r) represent correlations between YLGTD measurements in user mode and DermaLab Combo measurements. L, lightness; a, red-green axis; b, yellow-blue axis. Skin color level, skin color temperature, and skin color hue represent skin lightness, color saturation, and hue, respectively. ICC, intraclass correlation coefficient; CI, confidence interval; SD, standard deviation.
